# Supplementary material for: Charge transfer induced enhancement of near-IR two-photon absorption of 5,15-bis(azulenylethynyl) zinc(ii) porphyrins
Source: Royal Society of Chemistry journal article supplement (doi:10.1039/b704986b), 2007-01-01
Supplement: b704986b.pdf [file b704986b.pdf]

# **Charge transfer induced enhancement of near IR two-photon absorption of 5,15-bis(azulenylethynyl) zinc(II) porphyrins**

**Kil Suk Kim,<sup>a</sup> Su Bum Noh,<sup>a</sup> Takayuki Katsuda,<sup>b</sup> Shuji Ito,<sup>c</sup>**

**Atsuhiko Osuka<sup>\*,b</sup> and Dongho Kim<sup>\*,a</sup>**

*<sup>a</sup>Department of Chemistry, Yonsei University, Seoul 120-749, Korea*

*<sup>b</sup>Department of Chemistry, Graduate School of Science, Kyoto University, Sakyo-ku,  
Kyoto 606-8502, Japan.*

*<sup>c</sup>Department of Material Science and Technology, Faculty of Science and Technology,  
Hirosaki University, Hirosaki 036-8561, Japan.*

\*To whom it may correspondence should be addressed.

E-mail: osuka@kuchem.kyoto-u.ac.jp; dongho@yonsei.ac.kr

**Two-photon Absorption Cross-Section ( $\sigma^{(2)}$ ).** The TPA experiments were performed using the open-aperture Z-scan method (Figure S1) with 130 fs pulses from an optical parametric amplifier (Light Conversion, TOPAS) operating at a 5 kHz repetition rate using a Ti:sapphire regenerative amplifier system (Spectra-Physics, Hurricane). The laser beam was divided into two parts. One was monitored by a Ge/PN photodiode (New Focus) as intensity reference, and the other was used for the transmittance studies. After passing through an  $f = 10$  cm lens, the laser beam was focused and passed through a quartz cell. The position of the sample cell could be varied along the laser-beam direction (z-axis), so the local power density within the sample cell could be changed under a constant laser power level. The thickness of the cell was 1 mm. The transmitted laser beam from the sample cell was then probed using the same photodiode as used for reference monitoring. The on-axis peak intensity of the incident pulses at the focal point,  $I_0$ , ranged from 40 to 60 GW/cm. Assuming a Gaussian beam profile, the nonlinear absorption coefficient  $\beta$  can be obtained by curve fitting to the observed open aperture traces with the following equation:

$$T(z) = 1 - \frac{\beta I_0 (1 - e^{-\alpha_0 l})}{2\alpha_0 (1 + (z/z_0)^2)},$$

where  $\alpha_0$  is the linear absorption coefficient,  $l$  the sample length, and  $z_0$  the diffraction length of the incident beam. After obtaining the nonlinear absorption coefficient  $\beta$ , the TPA cross-section  $\sigma^{(2)}$  (in units of  $1 \text{ GM} = 10^{-50} \text{ cm}^4 \cdot \text{s} / \text{photon} \cdot \text{molecule}$ ) of a single solute molecule sample can be determined by using the following relationship:

$$\beta = \frac{\delta N_A d \times 10^{-3}}{h\nu},$$

where  $N_A$  is the Avogadro constant,  $d$  the concentration of the TPA compound in solution,  $h$  is Planck's constant, and  $\nu$  is the frequency of the incident laser beam. So as to satisfy the condition of  $\alpha l \ll 1$ , which allows the pure TPA  $\sigma^{(2)}$  values to be determined using a simulation procedure, the TPA cross-section value of AF-50 was measured as a reference compound; this control was found to exhibit a TPA value of 50 GM at 800 nm.

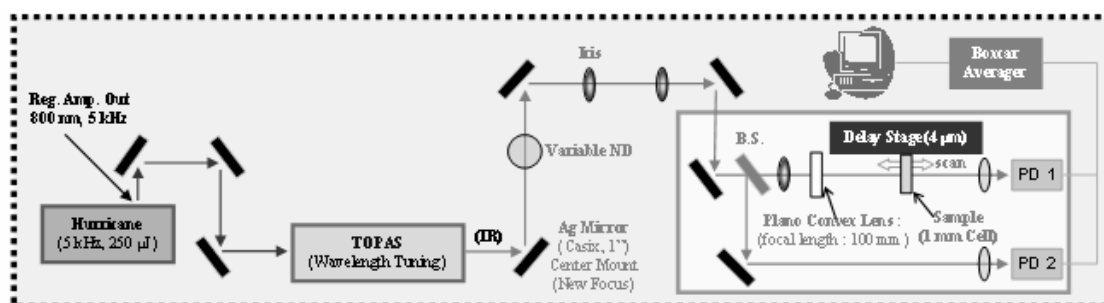

Figure S1. Schematic diagram of femtosecond open-aperture Z-scan set-up
